# Supplementary material for: Inter-layer superlubricity in a carbon nanotube array induced by high-temperature annealing
Source: Royal Society of Chemistry journal article supplement (doi:10.1039/d5cp01325a), 2025-01-01
Supplement: d5cp01325a2.pdf [file d5cp01325a2.pdf]

## Supporting Information

### **High-Temperature Annealing induced Interlayer Superlubricity in Carbon Nanotube Array**

*Yunlong Fan<sup>a</sup>, Yushun Zhao<sup>a,b,\*</sup>, Kaiyi Zheng<sup>a</sup>, Yingxia He<sup>a</sup>, Chao Sui<sup>b,c</sup>, Xiaodong*

*He<sup>a,b,c</sup>, Chao Wang<sup>a,b</sup>*

<sup>a</sup> School of Astronautics, Harbin Institute of Technology, Harbin 150001, China

<sup>b</sup> Center for Composite Materials and Structures, Harbin Institute of Technology,  
Harbin 150080, China

<sup>c</sup> National Key Laboratory of Science and Technology on Advanced Composites in  
Special Environments, Harbin Institute of Technology, Harbin 150080, China

**\*E-mail:** yushunzhao@hit.edu.cn

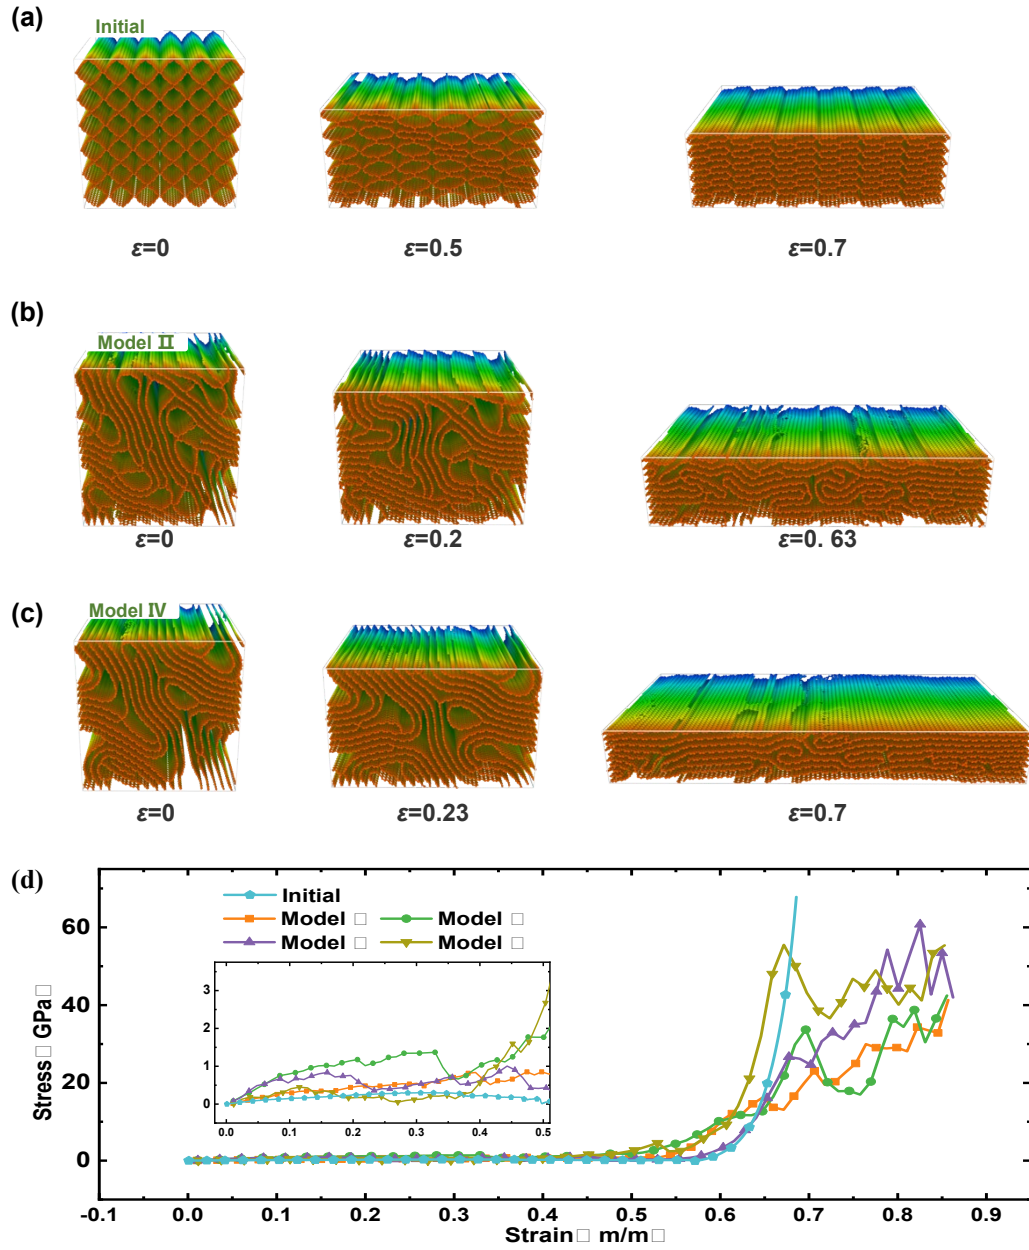

Figure S1. (a)-(c) Snapshots of others CNT array under compression loading. (d) The tensile stress-strain curves of all the Models.

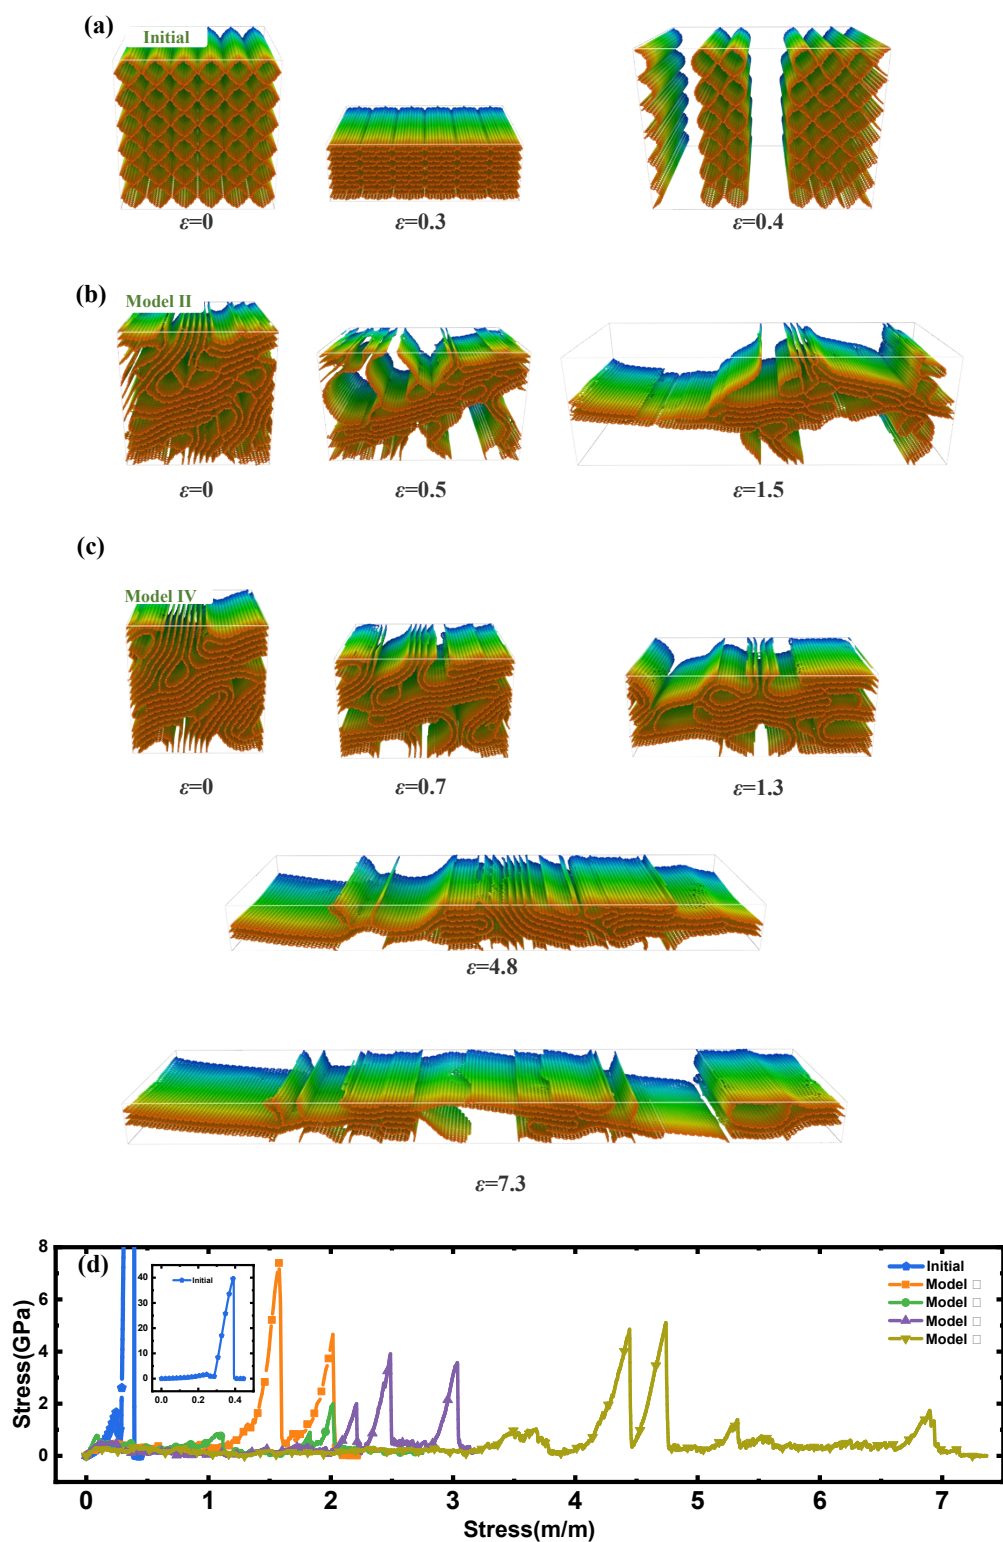

Figure S2. (a)-(c) Snapshots of others CNT array under compression loading. (d) The tensile stress-strain curves of all the Models.
